# Supplementary material for: Personalized Preclinical Trials in BRAF Inhibitor–Resistant Patient-Derived Xenograft Models Identify Second-Line Combination Therapies
Source: Oxford University Press journal article supplement (doi:10.1158/1078-0432.ccr-15-1762), 2015-12-16
Supplement: 10780432ccr151762-sup-152110_1_supp_3230678_nxx8xh.xlsx [file 10780432ccr151762-sup-152110_1_supp_3230678_nxx8xh.xlsx]

## Sheet: Sheet1
SAMPLE ID	MEDIAN EXON COVERAGE	KNOWN SOMATIC SHORT-VARIANTS (PERCENT-READS, COVERAGE)	LIKELY SOMATIC SHORT-VARIANTS (PERCENT-READS, COVERAGE)	HIGH-LEVEL (CN>8) AND FOCAL (CN>5) AMPLIFICATIONS OF GENES KNOWN TO BE RECURRENTLY AMPLIFIED IN CANCER (COPY-NUMBER, EXONS)	NON-FOCAL LOWER-LEVEL (CN<=8) AMPLIFICATIONS OF GENES KNOWN TO BE RECURRENTLY AMPLIFIED IN CANCER (COPY-NUMBER, EXONS)	HOMOZYGOUS DELETIONS OF GENES KNOWN TO BE RECURRENTLY DELETED IN CANCER (0,EXONS)	LIKELY FUNCTIONAL REARRANGEMENTS (e.g., GENE FUSIONS) (GENE1_GENE2_GENOMIC EVENT DESCRIPTION_SUPPORTING-READS)	SHORT VARIANTS OF UNKNOWN SIGNIFICANCE (PERCENT-READS, COVERAGE)	OBSERVED COPY NUMBER GAINS IN OTHER GENES (COPY-NUMBER, EXONS)	OTHER HOMOZYGOUS GENE DELETIONS (0,EXONS)	NOVEL REARRANGEMENTS OF UNKNOWN SIGNIFICANCE (GENE1_GENE2_GENOMIC EVENT DESCRIPTION_SUPPORTING-READS)
WM3901	NA	ATR_c.3245G>A_p.R1082H(0.5,1104), BRAF_c.1799T>A_p.V600E(0.84,3367)	none	BRAF_amplification(14, exons 18 of 18)	none	none	none	BLM_c.1928G>A_p.R643H(0.49,1273), CIC_c.2059G>A_p.A687T(0.4,551), CUL4A_c.1843C>A_p.L615I(0.11,821), FANCI_c.1822G>A_p.G608R(0.24,1078), FAT3_c.11303G>C_p.S3768T(0.05,578), FAT3_c.13408G>A_p.E4470K(0.67,934), FLT3_c.956C>T_p.S319L(0.65,836), FOXL2_c.761C>T_p.S254L(0.06,433), HGF_c.2065G>A_p.G689S(0.61,1339), KIT_c.152G>A_p.G51D(0.67,1048), NPM1_c.257C>T_p.T86M(0.36,606), NUP93_c.1456C>T_p.R486C(0…	none	none	none
WM3903-1	546	BRAF_c.1799T>A_p.V600E(0.5,836), MAP2K1_c.167A>C_p.Q56P(0.28,871)	ATM_c.1270C>T_p.P424S(0.47,532), ATR_c.1389G>A_p.W463*(0.31,599)	none	none	CDKN2A_loss(0, exons 4 of 5)	none	SMARCA4_c.589C>T_p.P197S(0.5,498), APC_c.2434G>A_p.D812N(0.47,444), ARID1A_c.1174C>T_p.P392S(0.31,652), ATM_c.2198G>A_p.G733D(0.42,493), ATM_c.8602C>T_p.L2868F(0.51,608), ATR_c.995G>A_p.G332D(0.32,828), AURKA_c.1072G>A_p.D358N(0.26,799), AXL_c.1258C>T_p.P420S(0.26,424), BACH1_c.1168G>A_p.E390K(0.27,962), BACH1_c.1756G>A_p.E586K(0.29,827), BCL2_c.469A>G_p.M157V(0.05,496), BLM_c.1675G>A_p.D559N(0.1…	KDM5A_amplification(8, exons 28 of 28), RAD52_amplification(8, exons 11 of 11)	none	none
WM3907-1	NA	BRAF_c.1799T>A_p.V600E(0.95,4877), GNAS_c.602G>A_p.R201H(0.01,1560)	ATRX_c.6505-50_6537ATGCTTACAAAATTTTATTTTTTTGTATATTCTTCCTTCTTTTTACAAAGGGAACCATGGAAGATAAGATTTATGATCGGCAA>C_p.splice(0.96,177)	BRAF_amplification(10, exons 18 of 18)	FGFR1_amplification(6, exons 18 of 18), MYC_amplification(6, exons 5 of 5), MYST3_amplification(6, exons 16 of 16), ZNF703_amplification(6, exons 2 of 2)	PTEN_loss(0, exons 3 of 9)	none	C11orf30_c.3253G>A_p.E1085K(1.0,482), GRIN2A_c.536G>A_p.G179D(0.5,995), MED12_c.670C>T_p.H224Y(0.64,1105), NSD1_c.2192_2193delCT_p.S731fs*1(0.07,1063), TRRAP_c.3871C>T_p.P1291S(0.73,966)	GPR124_amplification(6, exons 19 of 19), NBN_amplification(6, exons 16 of 16), PRKDC_amplification(6, exons 86 of 86), RUNX1T1_amplification(6, exons 15 of 15)	none	none
WM3908	672	BRAF_c.1798_1799GT>AA_p.V600K(0.64,952), CSF1R_c.95T>G_p.V32G(0.47,808), CTNNB1_c.134C>T_p.S45F(0.56,954), FBXW7_c.337_339delGAG_p.E113del(0.35,828), IDH1_c.394C>T_p.R132C(0.49,688)	none	CDK4_amplification(11, exons 7 of 7), MDM2_amplification(16, exons 11 of 11)	none	PTEN_loss(0, exons 2 of 9), TSC1_loss(0, exons 9 of 21)	none	ALK_c.265G>A_p.G89S(0.49,719), ARID1A_c.6770G>A_p.R2257Q(0.47,718), BCL6_c.1391G>T_p.S464I(0.75,1558), CHEK2_c.1622C>G_p.A541G(0.14,477), FANCA_c.1363T>A_p.S455T(0.3,686), FAT3_c.10222C>T_p.R3408W(0.49,465), FLT1_c.2164_2166delTCA_p.S722del(0.33,517), FLT4_c.3145G>A_p.D1049N(0.47,779), FLT4_c.682G>A_p.E228K(0.51,568), GNAS_c.476T>G_p.L159R(0.11,892), IL7R_c.835C>T_p.H279Y(0.49,846), MAP3K13_c.282…	KLHL6_amplification(6, exons 7 of 7), BCL6_amplification(6, exons 8 of 8)	none	CDK4_intergenicRegion_rearrangement_48, ERBB3_intergenicRegion_rearrangement_724, MDM2_STAB2_rearrangement_79, TSC1_TSC1_rearrangement_248
WM3909	718	BRAF_c.1799T>A_p.V600E(0.68,1495), PIK3R1_c.1699A>G_p.K567E(0.61,850)	none	none	none	CDKN2A_loss(0, exons 5 of 5), CDKN2B_loss(0, exons 5 of 5), PTEN_loss(0, exons 9 of 9)	none	BRCA2_c.352C>T_p.R118C(0.29,682), CIC_c.1067C>T_p.S356F(0.53,704), DNMT3A_c.630G>C_p.W210C(0.09,402), EPHB1_c.2746G>A_p.V916M(0.55,798), GATA3_c.701T>C_p.F234S(1.0,320), GSK3B_c.317A>G_p.H106R(0.06,905), NOTCH2_c.6748C>T_p.P2250S(0.5,955), NOTCH3_c.6631T>C_p.Y2211H(0.45,583), PAK7_c.519G>A_p.M173I(0.49,1093), PARP1_c.2371G>A_p.D791N(1.0,390), PMS2_c.445T>A_p.Y149N(0.35,1240), RICTOR_c.3289C>T_p.R…	none	none	none
WM3936-1	1016	BRAF_c.1799T>A_p.V600E(0.5,1803), NRAS_c.181C>A_p.Q61K(0.49,981), PIK3CA_c.3139C>T_p.H1047Y(0.5,1131), PTEN_c.314G>A_p.C105Y(1.0,504)	none	none	none	CDKN2A_loss(0, exons 4 of 5)	none	FANCA_c.3773T>C_p.V1258A(0.33,1183), FAT3_c.10252G>T_p.A3418S(0.49,789), MUTYH_c.1442G>A_p.R481H(0.49,798)	none	none	CDKN2A_intergenicRegion_rearrangement_349
WM3936-2	1028	BRAF_c.1799T>A_p.V600E(0.5,1962), NRAS_c.181C>A_p.Q61K(0.51,975), PIK3CA_c.3139C>T_p.H1047Y(0.49,1210), PTEN_c.314G>A_p.C105Y(1.0,728)	none	none	none	CDKN2A_loss(0, exons 4 of 5)	none	CARD11_c.2609A>G_p.N870S(0.08,1635), FANCA_c.3773T>C_p.V1258A(0.32,1279), FAT3_c.10252G>T_p.A3418S(0.49,865), MAP3K1_c.1337G>T_p.C446F(0.24,1102), MUTYH_c.1442G>A_p.R481H(0.46,757)	none	none	CDKN2A_intergenicRegion_rearrangement_369
WM3965-2	988	BRAF_c.1799T>A_p.V600E(0.25,1675)	none	MET_amplification(16, exons 20 of 20)	none	CDKN2A_loss(0, exons 5 of 5), CDKN2B_loss(0, exons 5 of 5)	none	ATRX_c.1010G>T_p.G337V(0.48,1102), CDC73_c.1135G>A_p.D379N(0.47,764), LRP1B_c.3397A>G_p.S1133G(0.51,1046), TSC2_c.2584G>A_p.A862T(0.5,761)	FAT3_amplification(16, exons 25 of 25), SMO_amplification(16, exons 12 of 12)	JAK1_loss(0, exons 15 of 24)	JAK1_intergenicRegion_rearrangement_282
WM3973	972	BRAF_c.1799T>A_p.V600E(1.0,1208), CIC_c.4166C>T_p.S1389F(1.0,676), MAP2K1_c.169A>G_p.K57E(0.26,1929)	MAP3K13_c.1214_1224delTGCATTTAGAC_p.M405fs*20(1.0,415)	none	MYC_amplification(7, exons 5 of 5)	CDKN2A_loss(0, exons 5 of 5), CDKN2B_loss(0, exons 5 of 5)	none	APCDD1_c.391C>T_p.R131C(0.61,1789), BLM_c.1097T>C_p.I366T(0.27,1346), DIS3_c.137C>T_p.P46L(0.51,762), FAT3_c.2683G>A_p.E895K(0.34,1261), GPR124_c.3437T>C_p.V1146A(0.5,1090), JUN_c.608_609insA_p.Q204fs*106(0.97,901), MAP2K1_c.605_606GG>AA_p.G202E(0.76,1506), MLL_c.1897T>C_p.S633P(0.7,1248), RICTOR_c.1252C>T_p.H418Y(0.52,1282)	none	none	none
WM3983	708	BRAF_c.1798_1799GT>AA_p.V600K(0.69,1382), GATA1_c.3G>A_p.M1I(1.0,272), HGF_c.1403G>A_p.R468H(0.4,1104), NRAS_c.181C>A_p.Q61K(0.27,872)	NF1_c.91_92delCA_p.H31fs*6(0.28,635), SETD2_c.2164C>T_p.Q722*(0.48,1265)	BRAF_amplification(8, exons 18 of 18), EGFR_amplification(9, exons 30 of 30), MET_amplification(9, exons 20 of 20), MYST3_amplification(12, exons 16 of 16)	SRC_amplification(7, exons 11 of 11), TOP1_amplification(7, exons 21 of 21), ZNF217_amplification(7, exons 4 of 4), AURKA_amplification(7, exons 8 of 8), ARFRP1_amplification(7, exons 6 of 6)	CDKN2A_loss(0, exons 5 of 5), CDKN2B_loss(0, exons 5 of 5)	none	AR_c.1424C>T_p.A475V(1.0,133), ARID1A_c.707G>T_p.G236V(0.33,429), ASXL1_c.3865C>T_p.R1289W(0.68,1600), ATM_c.8708C>T_p.P2903L(0.77,607), ATR_c.1865G>A_p.C622Y(1.0,368), CARD11_c.1853C>T_p.S618F(0.78,1680), CBL_c.884T>C_p.L295P(0.83,728), DOT1L_c.4406C>T_p.P1469L(0.31,520), EGFR_c.1190C>T_p.T397I(0.78,1898), FAT3_c.2687C>T_p.S896F(0.8,773), FLT4_c.3974G>A_p.G1325E(1.0,459), IRS2_c.3165_3165delC_p.…	CARD11_amplification(9, exons 24 of 24), IKZF1_amplification(9, exons 7 of 7), INHBA_amplification(9, exons 2 of 2), PIK3CG_amplification(9, exons 10 of 10), PMS2_amplification(9, exons 15 of 15), SMO_amplification(8, exons 10 of 12), ASXL1_amplification(7, exons 13 of 13), GNAS_amplification(7, exons 15 of 15)	none	none
WM4071-1	447	ATM_c.1009C>T_p.R337C(0.85,394), BRAF_c.1799T>A_p.V600E(0.67,894), PTEN_c.548_549insA_p.N184fs*6(0.89,320)	ATR_c.3146T>A_p.L1049*(0.42,385)	AKT3_amplification(8, exons 14 of 14), MET_amplification(93, exons 20 of 20), BRAF_amplification(8, exons 18 of 18), HGF_amplification(8, exons 19 of 19), CDK6_amplification(8, exons 7 of 7)	none	CDKN2A_loss(0, exons 2 of 5)	none	ATM_c.3194G>A_p.G1065E(0.09,450), BCL2L2_c.482G>A_p.R161H(0.69,385), CARD11_c.3286G>A_p.E1096K(0.84,430), FAT3_c.8872C>T_p.R2958C(0.9,310), RPA1_c.611C>T_p.T204I(0.65,471), SPEN_c.4994C>T_p.A1665V(0.64,457)	DDR2_amplification(8, exons 16 of 16), CDC73_amplification(8, exons 17 of 17), PAK7_amplification(14, exons 8 of 8), IKZF1_amplification(11, exons 7 of 7)	none	none
WM4071-2	487	ATM_c.1009C>T_p.R337C(0.89,416), BRAF_c.1799T>A_p.V600E(0.68,897), PTEN_c.548_549insA_p.N184fs*6(0.89,314)	ATR_c.3146T>A_p.L1049*(0.51,483)	MYC_amplification(8, exons 5 of 5), FGFR1_amplification(10, exons 18 of 18)	none	CDKN2A_loss(0, exons 2 of 5)	none	ATM_c.3194G>A_p.G1065E(0.13,499), BCL2L2_c.482G>A_p.R161H(0.34,425), CARD11_c.3286G>A_p.E1096K(1.0,342), FAT3_c.8872C>T_p.R2958C(0.86,308), RPA1_c.611C>T_p.T204I(0.58,491), SPEN_c.4994C>T_p.A1665V(0.5,598)	PAK7_amplification(8, exons 8 of 8), IKZF1_amplification(8, exons 7 of 7), PMS2_amplification(10, exons 15 of 15), PRKDC_amplification(8, exons 86 of 86), NBN_amplification(8, exons 16 of 16), RUNX1T1_amplification(8, exons 15 of 15)	none	none
